# Supplementary material for: A New Cloud‐Native Tool for Pharmacogenetic Analysis
Source: Preprints.org preprint supplement (doi:10.20944/preprints202402.0268.v1), 2024-02-05
Supplement: Supplementary file 1 [file supplementary]

## Supplemental data

### 1. Variants in the database in Pgxtools

Supplemental table 1, Genes and variants for PGx analysis

| Gene | Drug(s) | Variants | |
| --- | --- | --- | --- |
| cDNA | rs number |
| *COMT* | Opioid | c.472G>A | rs4680 |
| *CYP2B6* | Efavirenz | c.983T>C | rs28399499 |
|  | rs34223104 |
| c.219-237A>G | rs776746 |
| c.432+2T>C | rs55965422 |
| *CYP2C19* | Clopidogrel, Proton Pump Inhibitors (Omeprazole, Lansoprazole, Pantoprazole and Dexlansoprazole), Selective Serotonin Reuptake Inhibitors (Citalopram, Escitalopram and Sertraline), Tricyclic Antidepressants (Tertiary Amines Amitriptyline, Clomipramine, Doxepin, Imipramine and Trimipramine), Voriconazole | c.1A>G | rs28399504 |
| c.1297C>T | rs56337013 |
| c.395G>A | rs72552267 |
| c.819+2T>A | rs72558186 |
| c.358T>C | rs41291556 |
| c.431G>A | rs17884712 |
| c.680C>T | rs6413438 |
| c.-806C>T | rs12248560 |
| 332-23A>G in the absence of 681G>A | rs12769205 |
| c.430C>T | rs1799853 |
| c.1075A>C | rs1057910 |
| *CYP2C9* | Warfarin | c.1076T>C | rs56165452 |
| c.1080C>G | rs28371686 |
| c.818delA | rs9332131 |
| c.449G>A | rs7900194 |
| c.752A>G | rs2256871 |
| c.1003C>T | rs28371685 |
| c.1465C>T | rs9332239 |
| c.269T>C | rs72558187 |
| c.374G>A |  |
| c.485C>A | rs72558190 |
| c.895A>G | rs72558192 |
| c.1144C>T |  |
| c.1190A>C | rs72558193 |
| c.353_362del | rs1304490498 |
| c.389C>G | rs200965026 |
| c.641A>T |  |
| c.1429G>A | rs781583846 |
| c.395G>A | rs200183364 |
| 374G>T + 430C>T |  |
| c.-1639G>A | rs9923231 |
| c.85G>T | rs104894539 |
| *CYP2D6* | Ondansetron and Tropisetron, Selective Serotonin Reuptake Inhibitors (Paroxetine and Fluvoxamine), Opioid (Codeine, Tramadol and Hydrocodone), Atomoxetine, Tricyclic Antidepressants, Tamoxifen | c.775del | rs35742686 |
| c.506-1G>A | rs3892097 |
| c.454del | rs5030655 |
| c.971A>C | rs5030867 |
| c.505G>T | rs5030865 |
| c.886C>T | rs16947 |
| c.841_843del | rs5030656 |
| c.100C>T | rs1065852 |
| c.124G>A | rs5030862 |
| c.137dup | rs774671100 |
| c.320C>T | rs28371706 |
| c.805dup | rs72549352 |
| c.1012G>A | rs59421388 |
| c.406_408delins ATC | rs61736512+ rs1058164 |
| c.1319G>A | rs267608319 |
| c.320C>T | rs28371706 |
| c.985+39G>A | rs28371725 |
| c.1088_1089dup | rs72549346 |
| c.358T>A | rs1135822 |
| c.1030C>T | rs72549347 |
| c.975G>A | rs79292917 |
| c.785A>G | rs2279343 |
| c.516G>T | rs3745274 |
| *CYP3A5* | Tacrolimus | c.624G>A | rs10264272 |
| c.1035dup | rs41303343 |
| c.82C>T | rs55817950 |
| c.1009G>A | rs28383479 |
| *CYP4F2* | Warfarin | c.1457G>C | rs1135840 |
| *DPYD* | Fluoropyrimidines 5-fluorouracil | c.557A>G | rs115232898 |
| c.1129-5923C>G | rs75017182 |
| c.1679T>G | rs55886062 |
| c.1905+1G>A | rs3918290 |
| c.2846A>T | rs67376798 |
| c.295_298delTCAT | rs72549309 |
| c.703C>T | rs1801266 |
| c.2657G>A | rs1801267 |
| c.2983G>T | rs1801268 |
| c.1003G>T | rs72549306 |
| c.238G>C | rs1800462 |
| c.460G>A | rs1800460 |
| *IL28B* | PEG Interferon-Alpha-Based Regimens |  | rs12979860 |
| *NUDT15* | Thiopurine | c.52G>A | rs186364861 |
| c.681G>A | rs4244285 |
| c.636G>A | rs4986893 |
| *SLCO1B1* | Simvastatin | c.521T>C | rs4149056 |
| c.-910G>A | rs4149015 |
| *TPMT* | Thiopurine (thioguanine, mercaptopurine and azathioprine) | c.719A>G | rs1142345 |
| c.626-1G>A | rs1800584 |
| c.146T>C | rs72552740 |
| c.644G>A | rs56161402 |
| c.374C>T | rs200220210 |
| c.415C>T | rs116855232 |
| c.416G>A | rs147390019 |
| *VKORC1* | Warfarin | c.106G>T | rs61742245 |
| c.121G>T |  |
| c.134T>C | rs104894540 |
| c.172A>G | rs104894541 |
| c.196G>A | rs72547529 |
| c.358C>T | rs7200749 |
| c.383T>G | rs104894542 |
| c.1297G>A | rs2108622 |
| c.886C>T | rs16947 |

The table summarizes the genes, drugs and gene variants used in the Pgxtools. Gene variants are expressed in the form of cDNA change and rs number. Gene variants are selected from CPIC guidelines. Interpretations are made based on diplotypes in Pgxtools. The cDNA and rs numbers of SNPs are taken from allele definition tables in the CPIC guidelines. We have limited our scope to the single nucleotide polymorphisms (SNPs) in this article as the PGx significance of the SNPs are most studied and better understood. The other forms of variants such as large Indels, CNVs would be considered when PGx guidelines and software algorithms for them are more mature.

### 2. Visualization of BAM/CRAM in G1K with EnsEMBL

To investigate why a small percentage of samples have different variants and / or genotypes reported by G1K and Pgxtools in Table 2, we performed a manual three-way comparison by visually inspecting alignments in a genome browser in EnsEMBL. The screenshot shows that there is a mixture of G and A at the position 42,130,692 in both Chromosome 22 in the NA19210.final.cram in G1K alignment (Supplemental figure 1). If G > 50%, we call it wild type and if A > 50%, we call it variant 22:42130692:G:A.


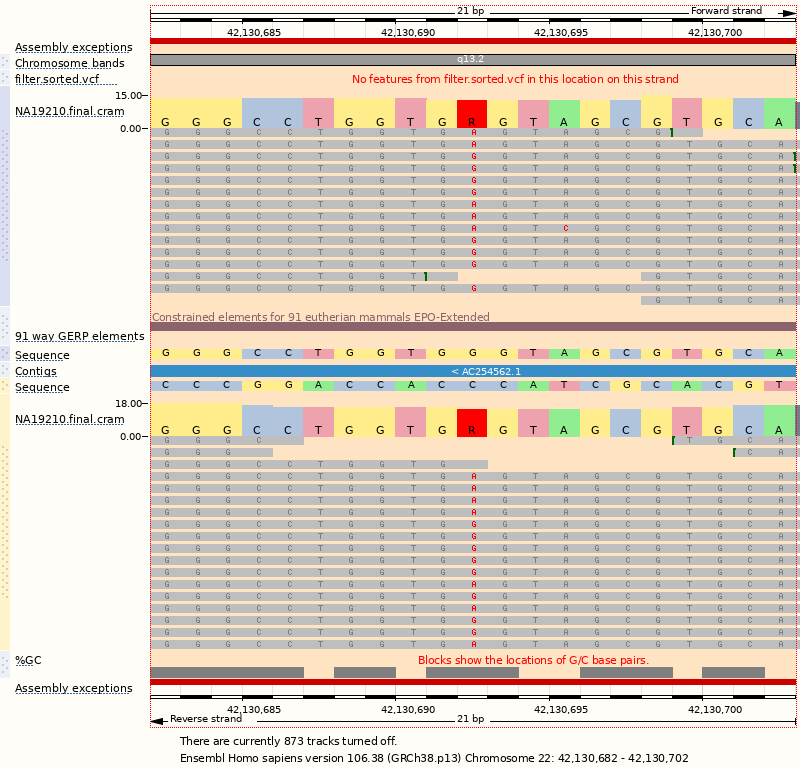


Supplemental figure 1. G1K sample alignments NA19210.final.cram around 42130692

### 3. PGx reports

1. Single-gene-drug-pair report format (e.g. HG01183_basic_report_TPMT_Thiopurine.html)


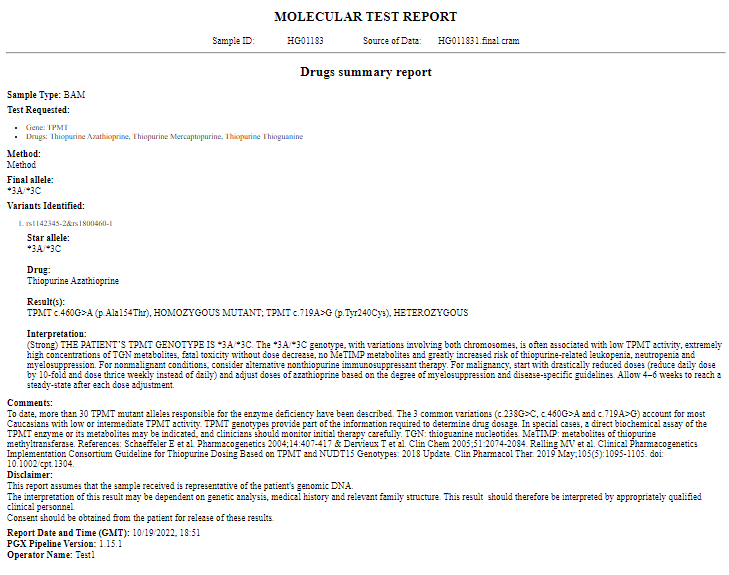


Supplemental figure 2. Pharmacogenetics report on *TPMT* and thiopurine pair for sample HG01183.

1. All-gene-summary report format (e.g. HG01183_genes_summary_report.html)


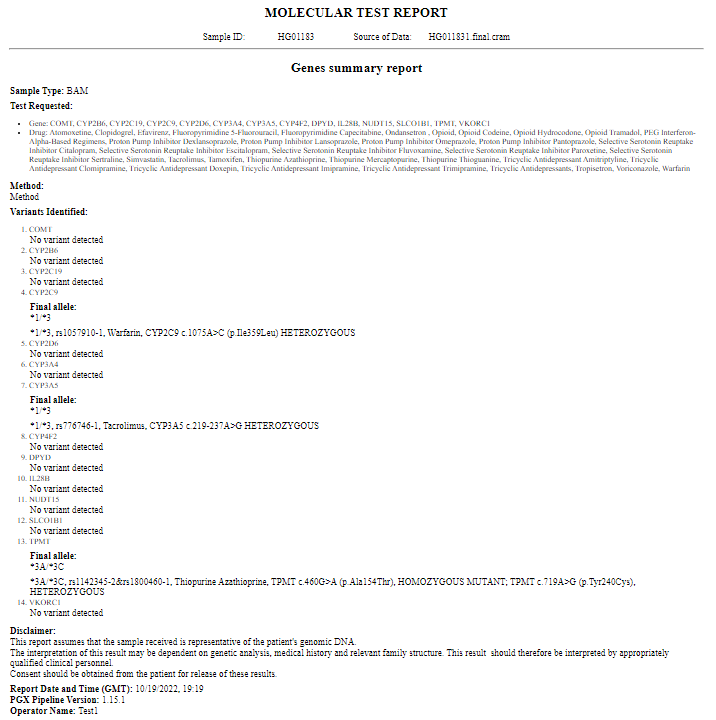


Supplemental figure 3. Pharmacogenetics summary report on all PGx gene variants found in sample HG01183.
